# Supplementary material for: Neuronal plasticity affects correlation between the size of dendritic spine and its postsynaptic density
Source: PubMed Central journal article supplement (PMC6368589; doi:10.1038/s41598-018-38412-7), 2019-02-08
Supplement: 41598_2018_38412_MOESM1_ESM.pdf [file 41598_2018_38412_MOESM1_ESM.pdf]

## SUPPLEMENTARY MATERIAL

### **Neuronal plasticity affects correlation between the size of dendritic spine and its postsynaptic density**

**Malgorzata Borczyk<sup>1</sup>, Malgorzata Alicja Śliwińska<sup>1,2</sup>, Anna Caly<sup>1</sup>, Tytus Bernas<sup>2</sup> and Kasia Radwanska<sup>\*1</sup>**

<sup>1</sup> Laboratory of Molecular Basis of Behavior, the Nencki Institute of Experimental Biology of Polish Academy of Sciences, ul. L. Pasteura 3, Warsaw 02-093, Poland.

<sup>2</sup> Laboratory of Imaging Tissue Structure and Function, the Nencki Institute of Experimental Biology of Polish Academy of Sciences, ul. L. Pasteura 3, Warsaw 02-093, Poland.

\* Corresponding author:

Dr. Kasia Radwanska, Nencki Institute of Experimental Biology, Polish Academy of Sciences, Warsaw, Poland, ul. L. Pasteura 3, 02-093 Warsaw, Poland; [kradwans@nencki.gov.pl](mailto:kradwans@nencki.gov.pl)

Tel: (48 22) 58 92 252

Fax: (48 22) 822 53 42

**Supplementary Video 1 & 2. Example scans from SBEM.** Video 1 shows a scan from a control slice. Video 2 shows a scan from a cLTP slice. Contrast was adjusted and Gaussian Blur of radius 1 px was applied.

**Supplementary Table 1. Results of parameters shown in Figures 1-4 analysed per sample.** Values are given as mean  $\pm$  SEM of medians calculated from each sample (n=4/group)

|                                                  | Control (mean $\pm$ SEM) | cLTP                    | t-test (df = 6) |       |
|--------------------------------------------------|--------------------------|-------------------------|-----------------|-------|
|                                                  |                          |                         | p               | t     |
| spine volume ( $\mu\text{m}^3$ )                 | 0.067 $\pm$ 0.0078       | 0.080 $\pm$ 0.0086      | 0.27            | 1.21  |
| PSD area ( $\mu\text{m}^2$ )                     | 0.06796 $\pm$ 0.006729   | 0.1093 $\pm$ 0.01519    | 0.0473*         | 2.49  |
| PSD-core volume ( $\mu\text{m}^3$ )              | 0.0056 $\pm$ 0.0008      | 0.0092 $\pm$ 0.0005     | 0.0093 **       | 2.27  |
| PSD area to spine volume ratio                   | 1.003 $\pm$ 0.05854      | 1.415 $\pm$ 0.06763     | 0.0037**        | 4.61  |
| PSD-core volume to spine volume ratio (fraction) | 0.085 $\pm$ 0.0071       | 0.12 $\pm$ 0.0059       | 0.0067 **       | 4.05  |
| PSD-core volume to PSD area ratio                | 0.08090 $\pm$ 0.007045   | 0.08578 $\pm$ 0.002758  | 0.5427          | 0.64  |
| spine volume SER - ( $\mu\text{m}^3$ )           | 0.05880 $\pm$ 0.009938   | 0.05211 $\pm$ 0.004397  | 0.5609          | 0.615 |
| spine volume SER + ( $\mu\text{m}^3$ )           | 0.09651 $\pm$ 0.01023    | 0.1399 $\pm$ 0.0281     | 0.1966          | 1.45  |
| PSD area SER - ( $\mu\text{m}^2$ )               | 0.05321 $\pm$ 0.00761    | 0.07496 $\pm$ 0.00777   | 0.0925          | 2.00  |
| PSD area SER + ( $\mu\text{m}^2$ )               | 0.09116 $\pm$ 0.0153     | 0.2152 $\pm$ 0.0392     | 0.0259*         | 2.94  |
| PSD-core volume SER - ( $\mu\text{m}^3$ )        | 0.004380 $\pm$ 0.000879  | 0.006451 $\pm$ 0.000831 | 0.1380          | 1.71  |
| PSD-core volume SER + ( $\mu\text{m}^3$ )        | 0.008540 $\pm$ 0.00171   | 0.01713 $\pm$ 0.00355   | 0.0721          | 2.18  |
| PSD area to spine volume ratio SER -             | 1.010 $\pm$ 0.03936      | 1.364 $\pm$ 0.1165      | 0.0282*         | 2.88  |
| PSD area to spine volume ratio SER +             | 1.040 $\pm$ 0.09418      | 1.436 $\pm$ 0.04716     | 0.0094**        | 3.76  |
| PSD -core volume to spine volume ratio SER -     | 0.08341 $\pm$ 0.00868    | 0.1172 $\pm$ 0.00809    | 0.0293*         | 2.85  |
| PSD-core volume to spine volume ratio SER +      | 0.08536 $\pm$ 0.00899    | 0.1213 $\pm$ 0.00721    | 0.0206*         | 3.20  |

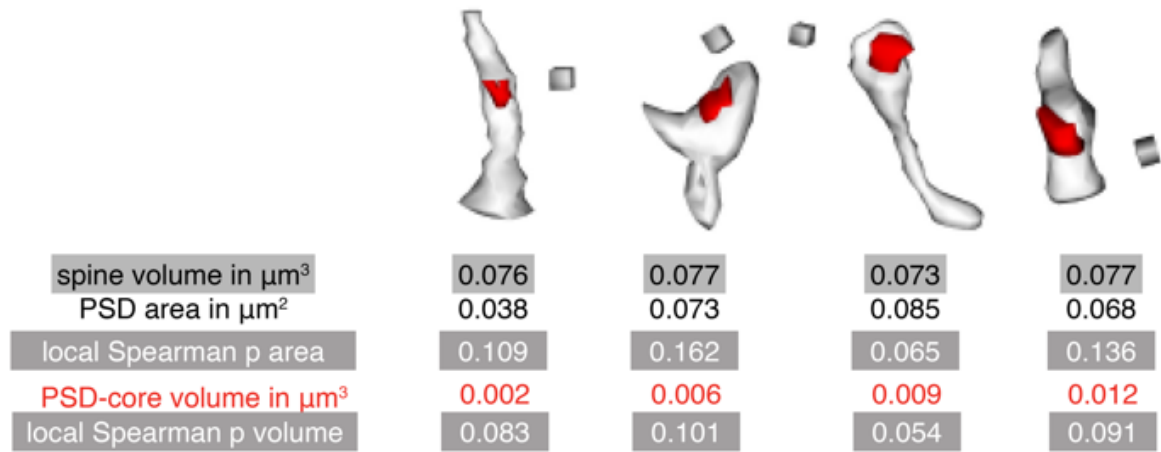

**Supplementary Figure 1. Range of PSD-core volumes and areas in spines of similar size.** 3D reconstructions of dendritic spines (white) and their PSDs (red) with parameters of dendritic spines given below. There is a 6-fold difference in PSD-core volume and only 1.5% difference in spine volume between the first and last dendritic spine. Cubes are  $0.0027 \mu\text{m}^3$ .

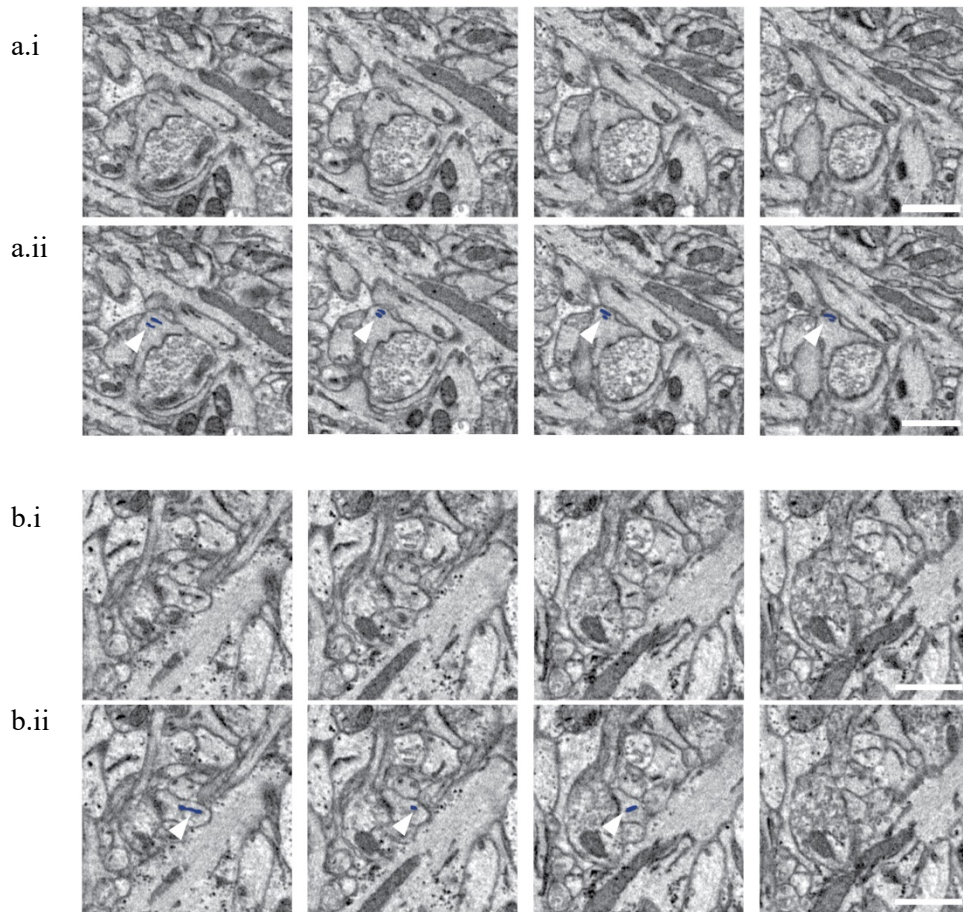

**Supplementary Figure 2. Dendritic spines with SER and spine apparatus.** **(a)** Consecutive EM images of a dendritic spine that contains spine apparatus, **(a.i)** images without annotations **(a.ii)** SER (in form of spine apparatus) is indicated in navy blue and white arrows. **(b)** Consecutive EM images of a dendritic spine that contains SER tubule, **(b.i)** images without annotations. **(B.ii)** SER is indicated in navy and with white arrow; scale bars 1  $\mu\text{m}$ .

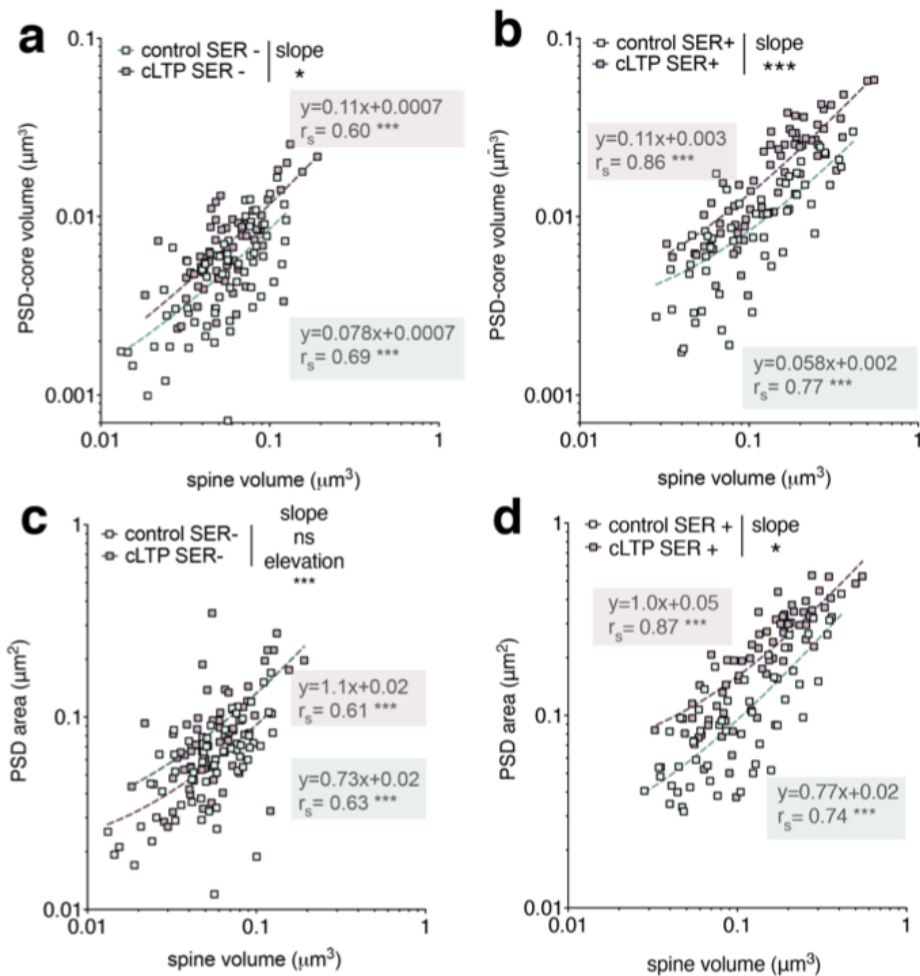

**Supplementary Figure 3. Correlation between parameters of dendritic spines with and without**

**SER. (a – d)** In all four cases PSD-core volume and area and dendritic spine volume of spines from control and cLTP-treated OHCs correlate with each other, however Spearman  $r$  values are higher for spines that contain SER. Also, regression lines are different between the two groups in all cases shown. **(a)** Correlation between PSD area and spine volume for spines without SER (control:  $p<0.0001$ , cLTP:  $p<0.0001$ ; slope difference: ANCOVA,  $F_{1,130}=2.58$ ,  $p=0.11$ ; elevation difference: ANCOVA,  $F_{1,131}=17.56$ ,  $p<0.0001$ ). **(b)** Correlation between PSD area and spine volume for spines with SER (control:  $p<0.0001$ , cLTP:  $p<0.0001$ ; slope difference: ANCOVA,  $F_{1,119}=6.08$ ,  $p=0.015$ ). **(c)** Correlation between PSD-core volume and spine volume for spines without SER (control:  $p<0.0001$ , cLTP:  $p<0.0001$ ; slope difference: ANCOVA,  $F_{1,130}=4.062$ ,  $p=0.049$ ). **(d)** Correlation between PSD-core volume and spine volume for spines with SER (control:  $p<0.0001$ , cLTP:  $p<0.0001$ ; slope difference: ANCOVA,  $F_{1,119}=21.42$ ,  $p<0.0001$ ). All axes are log10.

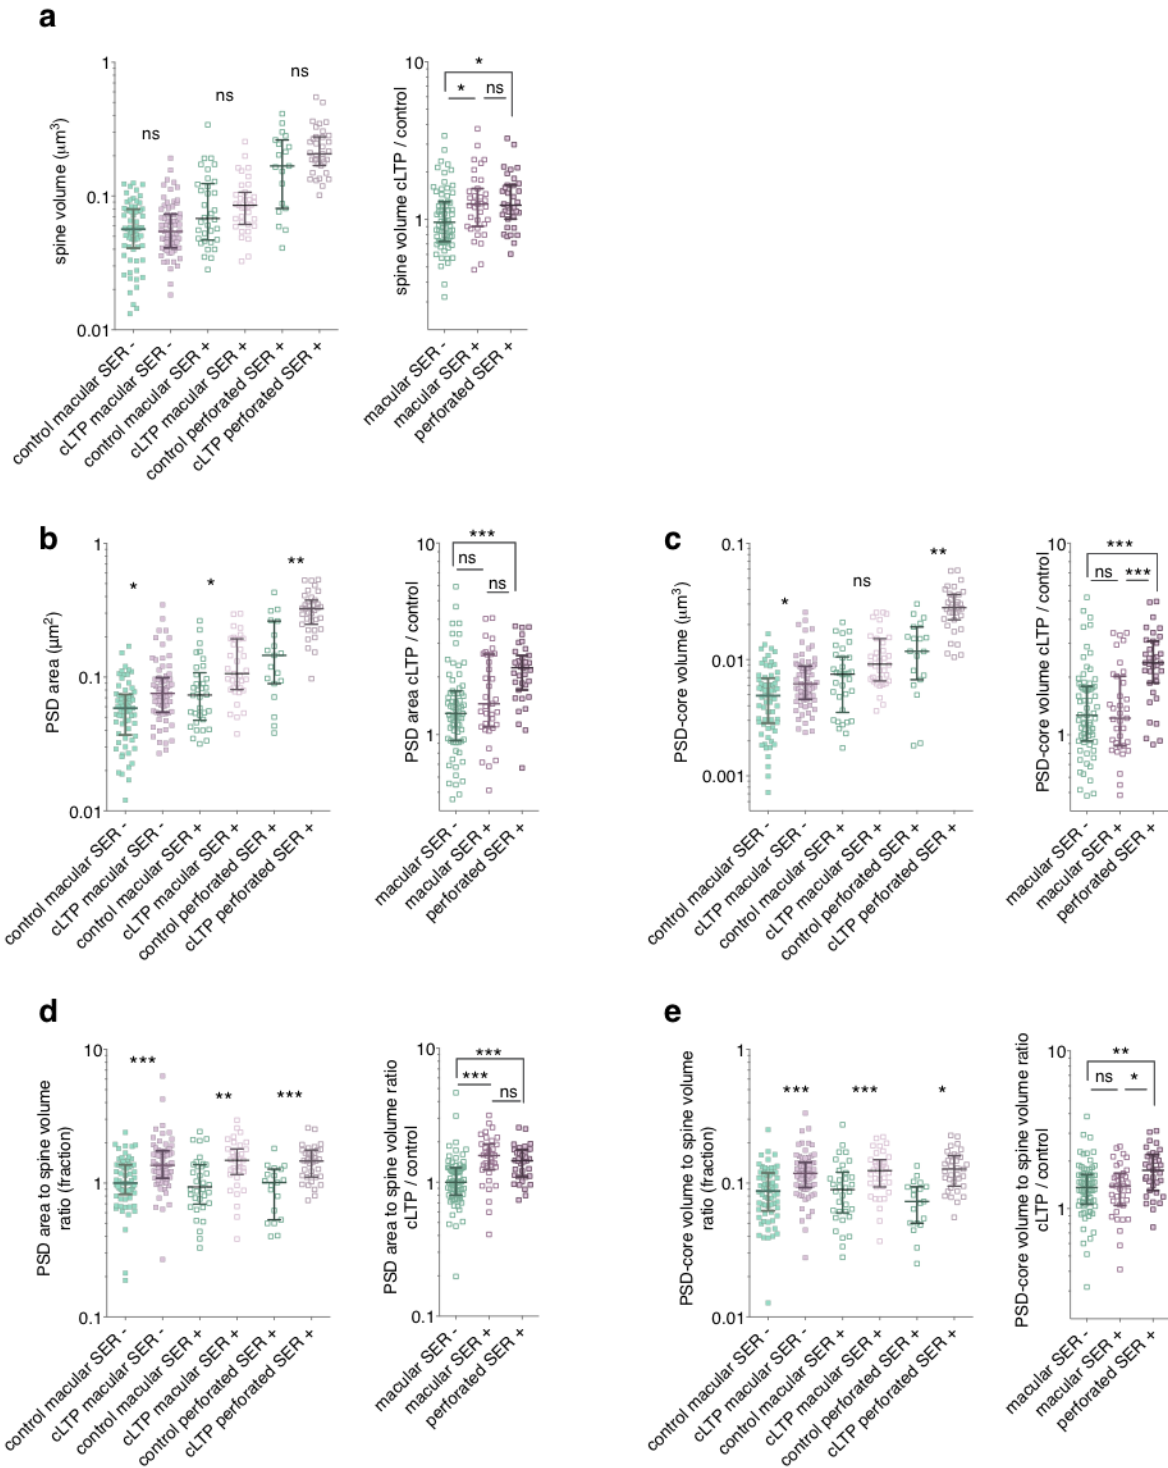

**Supplementary Figure 4. Spine parameters dependence of perforation of the PSD and SER content.** (a-e) Dendritic spines were divided into three categories – spines that do not contain SER, spines that contain SER and have a simple, macular, PSD and spines that both contain SER and a perforated PSD. Non-parametric Kruskal-Wallis test with Dunn’s post-hoc was performed in all cases. (a) Spine volume ( $H = 109$ ,  $p < 0.0001$ ). Relative spine volume change is higher in the group of

dendritic spines with SER regardless of perforation ( $H = 10.20$ ,  $p=0.0061$ ). **(b)** PSD area is larger after cLTP irrespectively of the SER content and perforation ( $H = 114.8$ ,  $p < 0.0001$ ). Relative PSD area increase ( $H = 19.29$ ,  $p < 0.0001$ ). **(c)** PSD-core volume ( $H = 110.2$ ,  $p < 0.0001$ ). PSD-core volume increase is more pronounced in the spines with SER and perforation ( $H = 25.55$ ,  $p < 0.0001$ ). **(d)** PSD area to spine volume ratio increased in all three categories ( $H = 39.94$ ,  $p < 0.0001$ ; relative increase:  $H = 27.20$ ,  $p < 0.0001$ ). **(e)** PSD-core volume to spine volume ratio is higher after cLTP for all three categories of dendritic spines ( $H = 43.88$ ,  $p < 0.0001$ ). PSD-core to spine volume ratio increase does not depend on SER-content, but is more pronounced in dendritic spines with perforated PSDs ( $H = 10.89$ ,  $p = 0.0043$ ). Median +/- interquartile range are indicated, all axes are log10.
